# Supplementary material
Source: PubMed Central journal article supplement (PMC6038006)
Supplement: CEI-193-84-s005.pdf [file CEI-193-84-s005.pdf]

638

**Table S1.** Clinical characteristics for subjects included in third trimester placental analyses ( $n = 36$ ).

|                                            | Preeclampsia<br>( $n = 23$ ) | Healthy pregnancy<br>( $n = 13$ ) |
|--------------------------------------------|------------------------------|-----------------------------------|
| Baseline characteristics                   |                              |                                   |
| Maternal age, years                        | 30 (6) <sup>a</sup>          | 32 (5) <sup>a</sup>               |
| Primiparae, $n$ (%)                        | 12 (52) <sup>b,*</sup>       | 1 (8) <sup>b</sup>                |
| Characteristics at delivery                |                              |                                   |
| Body mass index, $\text{kg/m}^2$           | 29 (8) <sup>b</sup>          | 29 (6) <sup>b</sup>               |
| Systolic blood pressure, mmHg              | 151 (12) <sup>a,*</sup>      | 119 (9) <sup>a</sup>              |
| Diastolic blood pressure, mmHg             | 100 (8) <sup>a,*</sup>       | 71 (9) <sup>a</sup>               |
| Gestational age delivery, weeks            | 32 (4) <sup>b,*</sup>        | 39 (1) <sup>b</sup>               |
| Placental weight, g                        | 350 (193) <sup>b,*</sup>     | 580 (241) <sup>b</sup>            |
| Fetal birth weight, g                      | 1780 (995) <sup>b,*</sup>    | 3590 (630) <sup>b</sup>           |
| FGR, $n$ (%)                               | 12 (52) <sup>b</sup>         | n.a.                              |
| Severe preeclampsia <sup>†</sup> , $n$ (%) | 16 (70) <sup>b</sup>         | n.a.                              |

Continuous variables are presented as mean with standard deviation (a) or median with interquartile range (b). FGR, fetal growth restriction; n.a.; not applicable.

Comparisons between outcome groups (two-sided T-tests or Mann-Whitney U-test for continuous variables, Chi-square test for categorical variables): \*  $P < 0.05$  vs healthy pregnancies. †Preeclampsia was sub-phenotyped as severe if diagnosed with one or more features (40, 64).

639

640
