# Supplementary material
Source: PubMed Central journal article supplement (PMC6038006)
Supplement: CEI-193-84-s006.pdf [file CEI-193-84-s006.pdf]

641

**Table S2.** Clinical characteristics and markers for subjects included in serum analyses ( $n = 105$ ).

|                                            | Preeclampsia<br>( $n = 34$ )  | Healthy pregnancy<br>( $n = 43$ ) | Non-pregnant<br>( $n = 28$ ) |
|--------------------------------------------|-------------------------------|-----------------------------------|------------------------------|
| Baseline characteristics                   |                               |                                   |                              |
| Maternal age, years                        | 31 (6) <sup>a</sup>           | 32 (4) <sup>a</sup>               | 30 (5) <sup>a</sup>          |
| Primiparae, $n$ (%)                        | 19 (56) <sup>b,*</sup>        | 4 (9) <sup>b</sup>                | n.a.                         |
| Characteristics at time of phlebotomy      |                               |                                   |                              |
| Body mass index, $\text{kg}/\text{m}^2$    | 28 (7) <sup>b,**</sup>        | 28 (6) <sup>b,**</sup>            | 22 (5) <sup>b</sup>          |
| Systolic blood pressure, mmHg              | 157 (22) <sup>a,*,**</sup>    | 115 (13) <sup>a</sup>             | 111 (8) <sup>a</sup>         |
| Diastolic blood pressure,                  | 99 (11) <sup>a,*,**</sup>     | 69 (9) <sup>a</sup>               | 69 (7) <sup>a</sup>          |
| GA at blood draw <sup>‡</sup> , weeks      | 31 (4) <sup>b,*</sup>         | 38 (11) <sup>b</sup>              | n.a.                         |
| Characteristics at time of delivery        |                               |                                   |                              |
| GA delivery, weeks                         | 31 (4) <sup>b,*</sup>         | 39 (1) <sup>b</sup>               | n.a.                         |
| Placental weight, g                        | 280 (165) <sup>b,*</sup>      | 620 (190) <sup>b</sup>            | n.a.                         |
| Fetal birth weight, g                      | 1335 (876) <sup>b,*</sup>     | 3540 (335) <sup>b</sup>           | n.a.                         |
| FGR, $n$ (%)                               | 20 (59) <sup>b</sup>          | n.a.                              | n.a.                         |
| Severe preeclampsia <sup>†</sup> , $n$ (%) | 27 (79) <sup>b</sup>          | n.a.                              | n.a.                         |
| Serum markers                              |                               |                                   |                              |
| sFlt-1 (ng/ml)                             | 1510 (1148) <sup>b,*,**</sup> | 154 (227) <sup>b,**</sup>         | 0 (3)                        |
| hsCRP ( $\mu\text{g}/\text{ml}$ )          | 4.5 (14.8) <sup>b,*,**</sup>  | 3.1 (3.3) <sup>b,**</sup>         | 0.5 (0.9)                    |

Continuous variables are presented as mean with standard deviation (a) or median with interquartile range (b). FGR, fetal growth restriction; GA, gestational age; hsCRP, high sensitivity C-reactive protein; n.a., not applicable; sFlt, soluble fms-like tyrosine kinase. Comparisons between outcome groups (two-sided T-tests or Mann-Whitney U-test for comparisons of continuous variables between two groups, ANOVA and Tukey's test or Kruskal-Wallis and Dunn's test for comparisons of continuous variables between three groups, Chi-square test for categorical variables): \* $P < 0.05$  vs healthy pregnant. \*\* $P < 0.05$  vs healthy non-pregnant. ‡GA at blood draw differs from GA at delivery only for healthy pregnant controls sampled during pregnancy ( $n = 18$ ). †Preeclampsia was sub-severe if diagnosed with one or more severe features [1, 2].

642
